# Supplementary material for: Clinical Characteristics, Patterns of Care, and Treatment Outcomes of Radiation-Associated Sarcomas
Source: MDPI journal article supplement (doi:10.3390/cancers16101918), 2024-05-18
Supplement: s1 [file s1]

**Supplemental Table S1.** Summary of next-generation sequencing results in radiation-associated sarcomas (n = 27).

| Category                                | Gene      | Genetic alteration                           | [n, (%)] |
|-----------------------------------------|-----------|----------------------------------------------|----------|
| Short nucleotide or amino acid variants |           |                                              |          |
|                                         | TP53      | Missense, nonsense, and frameshift mutations | 12 (44)  |
|                                         | BRCA2     | G2274fs*17<br>L3045fs*17                     | 2 (7)    |
|                                         | RB1       | A106fs*4<br>p.L335 stop gain—LOF             | 2 (7)    |
|                                         | NF2       | p.E347fs<br>F256fs*40                        | 2 (5)    |
|                                         | NF1       | p.D1067fs LOF                                | 1 (4)    |
|                                         | PLCG1     | p.R707Q splice region variant—GOF            | 1 (4)    |
|                                         | SMAD4     | p.R361C missense LOF                         | 1 (4)    |
|                                         | PIK3CA    | p.H1047R missense GOF variant                | 1 (4)    |
|                                         | HRAS      | p.G13V missense GOF                          | 1 (4)    |
|                                         | MSH3      | c.1653+1G>A splice region variant—LOF        | 1 (4)    |
|                                         | MUTYH     | G382D                                        | 1 (4)    |
|                                         | DNMT3A    | R635W—subclonal<br>R882H—subclonal           | 1 (4)    |
|                                         | SETD2     | G1279*                                       | 1 (4)    |
|                                         | TERT      | c.-57A>C variant—promoter mutation           | 1 (4)    |
|                                         | BAP1      | L564fs*3                                     | 1 (4)    |
|                                         | ATRX      | c.5698-2A>G splice region variant—LOF        | 1 (4)    |
|                                         | ZFHX3     | p.E1900fs—LOF                                | 1 (4)    |
|                                         | PAX5      | p.A322fs—LOF                                 | 1 (4)    |
|                                         | ASXL1     | K559fs*6                                     | 1 (4)    |
| Copy number variants                    |           |                                              |          |
|                                         | CDKN2A/B  | Copy number loss                             | 7 (26)   |
|                                         | MYC       | Amplification/copy number gain               | 6 (22)   |
|                                         | FGFR1     | Amplification                                | 2 (7)    |
|                                         | PDGFRA    | Amplification/copy number gain               | 2 (7)    |
|                                         | RB1       | Copy number loss                             | 2 (7)    |
|                                         | PTEN      | Copy number loss                             | 2 (7)    |
|                                         | BIRC3     | Amplification                                | 1 (4)    |
|                                         | MDM2/CDK4 | Amplification                                | 1 (4)    |
|                                         | HGF       | Amplification                                | 1 (4)    |
|                                         | KDR       | Amplification                                | 1 (4)    |
|                                         | KIT       | Amplification                                | 1 (4)    |
|                                         | PDPK1     | Copy number gain                             | 1 (4)    |
|                                         | CCNE1     | Copy number gain                             | 1 (4)    |
|                                         | MCL1      | Copy number gain                             | 1 (4)    |
|                                         | SUFU      | Copy number loss                             | 1 (4)    |
|                                         | FOXA1     | Copy number loss                             | 1 (4)    |
|                                         | EED       | Copy number loss                             | 1 (4)    |
|                                         | MTAP      | Copy number loss                             | 1 (4)    |
|                                         | NF1       | Copy number loss                             | 1 (4)    |
|                                         | RASA1     | Copy number loss                             | 1 (4)    |
| Rearrangements                          |           |                                              |          |

|  |            |                           |       |
|--|------------|---------------------------|-------|
|  | NF1        | SS18-NF1 fusion           | 1 (4) |
|  | NAB2-STAT6 | Chromosomal rearrangement | 1 (4) |
|  | DSCR4-ERG  | Chromosomal rearrangement | 1 (4) |
